# Supplementary material for: Influence of adhesion-promoting glycolipids on the structure and stability of solid-supported lipid double-bilayers
Source: Royal Society of Chemistry journal article supplement (doi:10.1039/d3sm01615c), 2024-01-01
Supplement: d3sm01615c1.pdf [file d3sm01615c1.pdf]

# Supporting Information: Influence of adhesion-promoting glycolipids on the structure and stability of solid-supported lipid double-bilayers

Lukas Bange,<sup>†</sup> Tetiana Mukhina,<sup>†</sup> Giovanna Fragneto,<sup>‡,§</sup> Valeria Rondelli,<sup>\*,¶</sup>  
and Emanuel Schneck<sup>\*,†</sup>

<sup>†</sup>*Institute for Condensed Matter Physics, TU Darmstadt, Hochschulstraße 8, 64289 Darmstadt,  
Germany*

<sup>‡</sup>*Institut Laue-Langevin, Grenoble, France*

<sup>¶</sup>*Department of Medical Biotechnology and Translational Medicine, Università degli Studi di  
Milano, Italy*

<sup>§</sup>*The European Spallation Source, ERIC, Lund, Sweden*

E-mail: valeria.rondelli@unimi.it; emanuel.schneck@pkm.tu-darmstadt.de

## Calculation of glycolipid headgroup volumes and SLDs

Volumes of the headgroups of LacCer and Trihexo were calculated as  $v_{\text{GHG}} = 419 \text{ \AA}^3$  and  $v_{\text{GHG}} = 551 \text{ \AA}^3$   
with the online tool *Molinspiration*,<sup>1</sup> based on the *smiles* representations

"C=CC(C(COC1C(C(C(C(O1)CO)OC2C(C(C(C(O2)CO)O)O)O)O)O)NC(=O)C)O"

and

"C=CC(O)C(COC3OC(CO)C(OC2OC(CO)C(OC1OC(CO)C(O)C(O)C1O)C(O)C2O)C(O)C3O)NC(C)=O"

of the headgroups of LacCer and Trihexo, respectively. The volume prediction by the molinspiration tool uses the contributions of chemical groups, which were optimized with a large training set of molecular volumes with a semi-empirical quantum-chemical method (AM1) for the calculation of molecular electronic structures. The predicted volumes are in satisfactory agreement with alternative estimates of saccharide volumes,<sup>2</sup> where each mono-saccharide has a volume of 104 cm<sup>3</sup>/mol (molinspiration: 92 cm<sup>3</sup>/mol).

The SLDs of the headgroups in H<sub>2</sub>O and D<sub>2</sub>O,

$$\rho_{\text{GHG}}^{\text{H}_2\text{O}}(\text{LacCer}) = 1.957 \cdot 10^{-6} \text{ \AA}^{-2}$$

$$\rho_{\text{GHG}}^{\text{D}_2\text{O}}(\text{LacCer}) = 3.747 \cdot 10^{-6} \text{ \AA}^{-2}$$

$$\rho_{\text{GHG}}^{\text{H}_2\text{O}}(\text{Trihexo}) = 2.073 \cdot 10^{-6} \text{ \AA}^{-2}$$

$$\rho_{\text{GHG}}^{\text{D}_2\text{O}}(\text{Trihexo}) = 3.935 \cdot 10^{-6} \text{ \AA}^{-2}$$

were then obtained from the total coherent scattering lengths<sup>3</sup> per headgroup (see Eq. 2 in the main text),

$$b_{\text{tot}}^{\text{H}_2\text{O}}(\text{LacCer}) = 82.74 \text{ fm}$$

$$b_{\text{tot}}^{\text{D}_2\text{O}}(\text{LacCer}) = 157.38 \text{ fm}$$

$$b_{\text{tot}}^{\text{H}_2\text{O}}(\text{Trihexo}) = 114.24 \text{ fm}$$

$$b_{\text{tot}}^{\text{D}_2\text{O}}(\text{Trihexo}) = 216.87 \text{ fm}$$

, where all hydrogen atoms of OH groups were assumed to exchange with deuterium in the D<sub>2</sub>O environment. With the SLDs in H<sub>2</sub>O and D<sub>2</sub>O at hand, the parameters *A* and *B* for Eq. 3 in the main text were calculated by solving the equations

$$\rho_{\text{GHG}}^{\text{H}_2\text{O}} = A + B\rho_{\text{H}_2\text{O}}$$

$$\rho_{\text{GHG}}^{\text{D}_2\text{O}} = A + B\rho_{\text{D}_2\text{O}}$$

, where  $\rho_{\text{H}_2\text{O}} = -0.56 \cdot 10^{-6} \text{ \AA}^{-2}$  and  $\rho_{\text{D}_2\text{O}} = 6.37 \cdot 10^{-6} \text{ \AA}^{-2}$ , yielding

$$A = \frac{\rho_{\text{GHG}}^{\text{H}_2\text{O}}\rho_{\text{D}_2\text{O}} - \rho_{\text{GHG}}^{\text{D}_2\text{O}}\rho_{\text{H}_2\text{O}}}{\rho_{\text{D}_2\text{O}} - \rho_{\text{H}_2\text{O}}}$$

$$B = \frac{\rho_{\text{GHG}}^{\text{D2O}} - \rho_{\text{GHG}}^{\text{H2O}}}{\rho_{\text{D2O}} - \rho_{\text{H2O}}}$$

## Influence of $\sigma_{\text{fluc}}^{\text{prox}}$ and $\sigma_{\text{fluc}}^{\text{dist}}$ on the volume fraction profiles

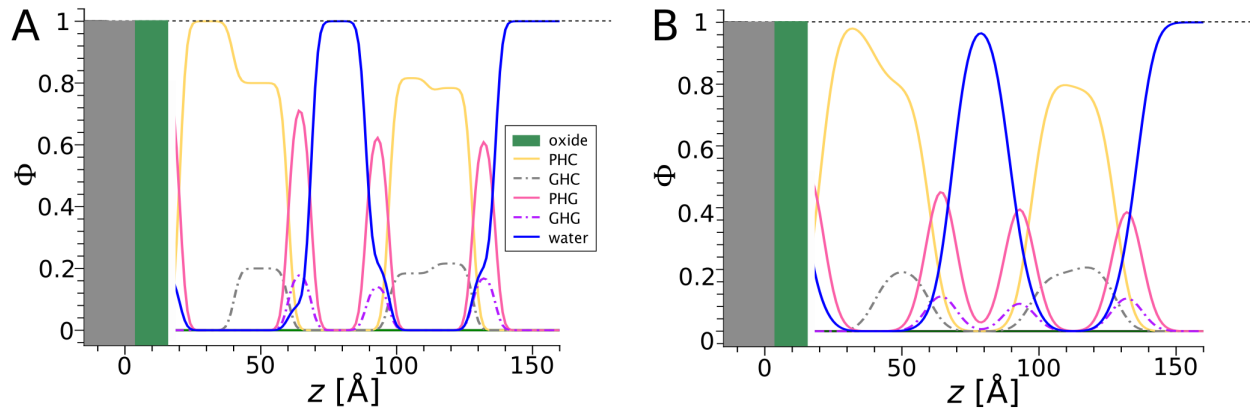

Figure S1: Volume fraction profiles for a PC/Trihexo FLB at 50°C before (A) and after (B) convolution of the bilayer-related volume fractions with Gaussian functions of widths  $\sigma_{\text{fluc}}^{\text{prox}}$  and  $\sigma_{\text{fluc}}^{\text{dist}}$ .

## Additional NR data and fits

### PC FLBs

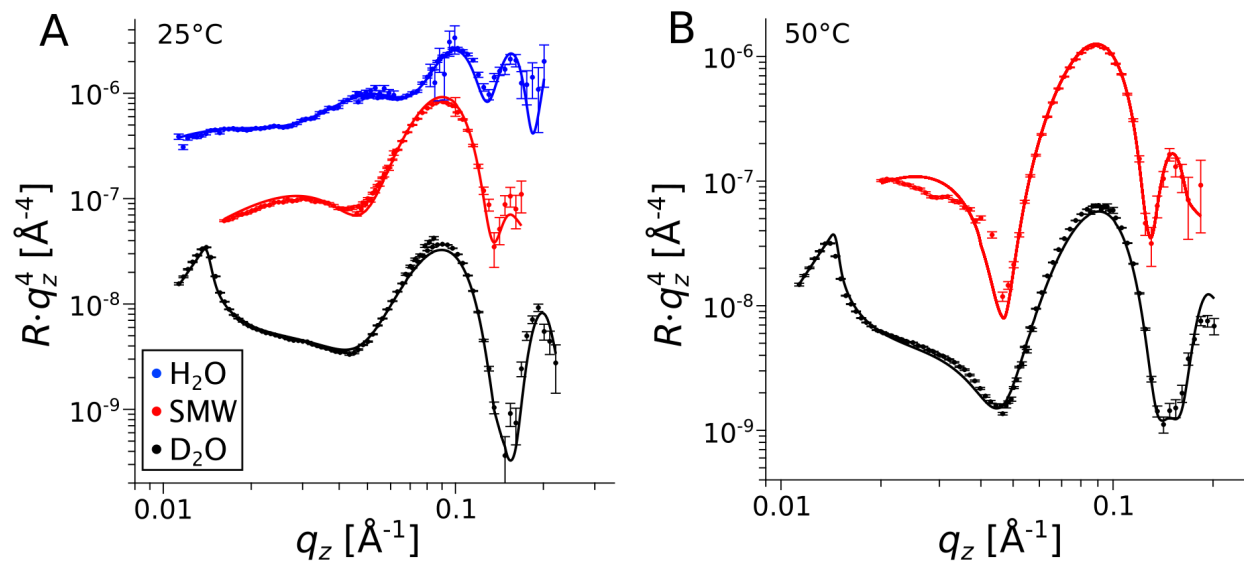

Figure S2: NR curves obtained at 25°C (A) and 50°C (B) with a PC FLB (glycolipid-free reference) based on chain-hydrogenous phospholipids. Solid lines: simulated reflectivity curves corresponding to a common volume fraction model reproducing all reflectivity curves obtained for each temperature.

## PC/LacCer FLBs

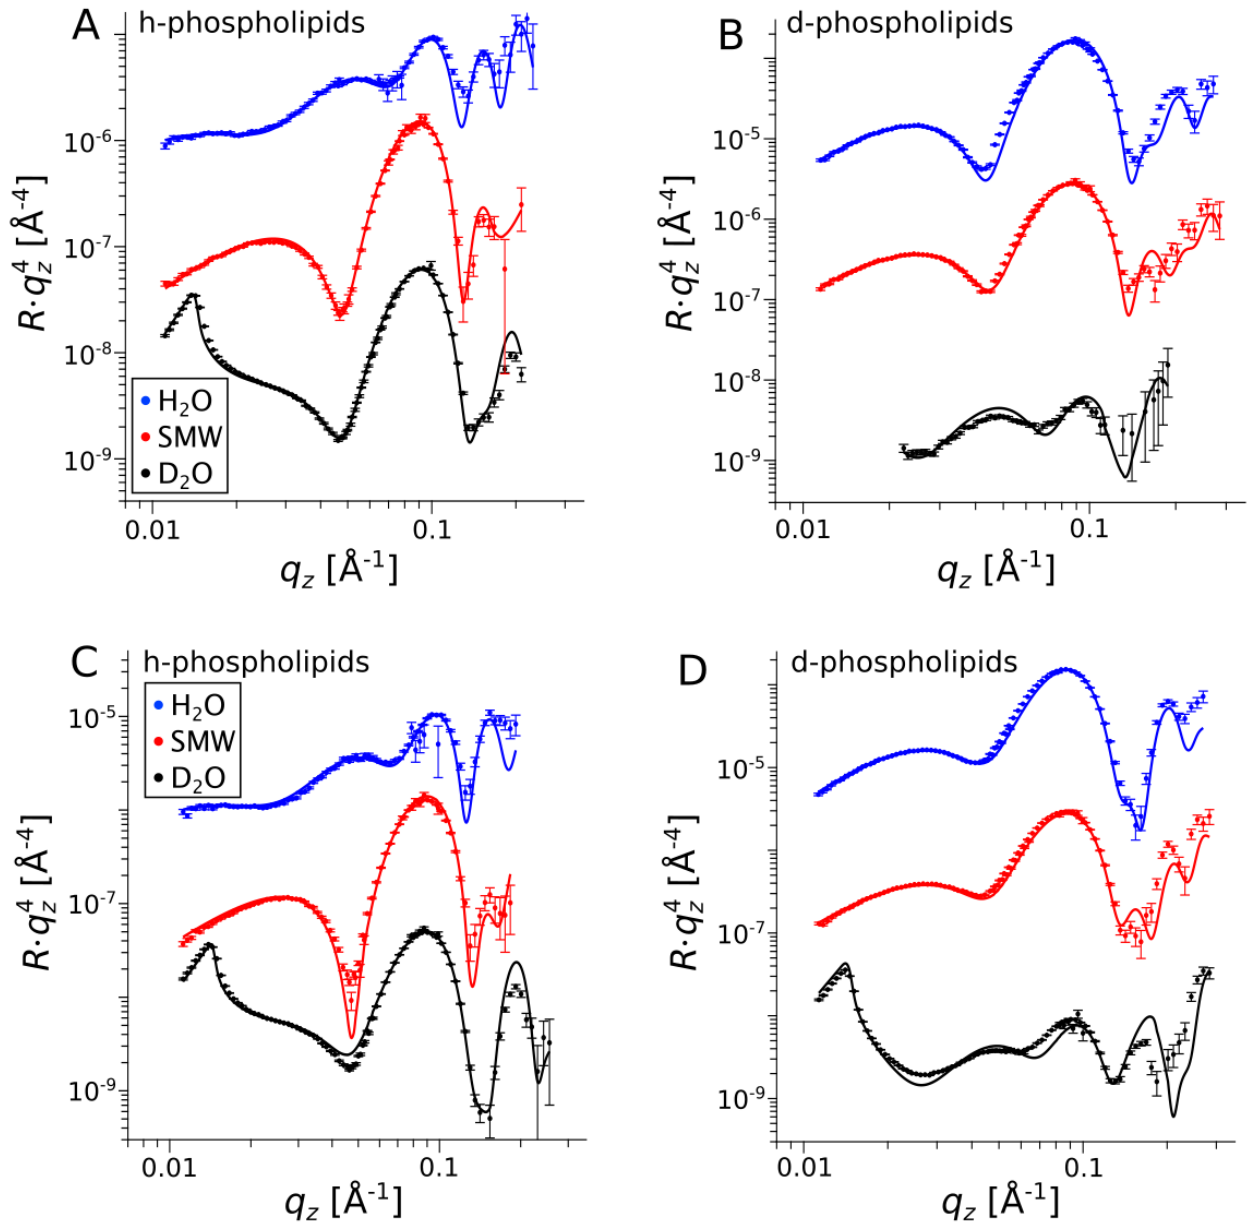

Figure S3: NR curves obtained at 50°C (A, B) and 25°C (C, D) with a PC/LacCer FLB. (A, C) Sample with chain-hydrogenous phospholipids. (B, D) Sample with chain-deuterated phospholipids. Solid lines: simulated reflectivity curves corresponding to a common volume fraction model reproducing all six reflectivity curves obtained for each temperature.

## PC/Trihexo FLBs

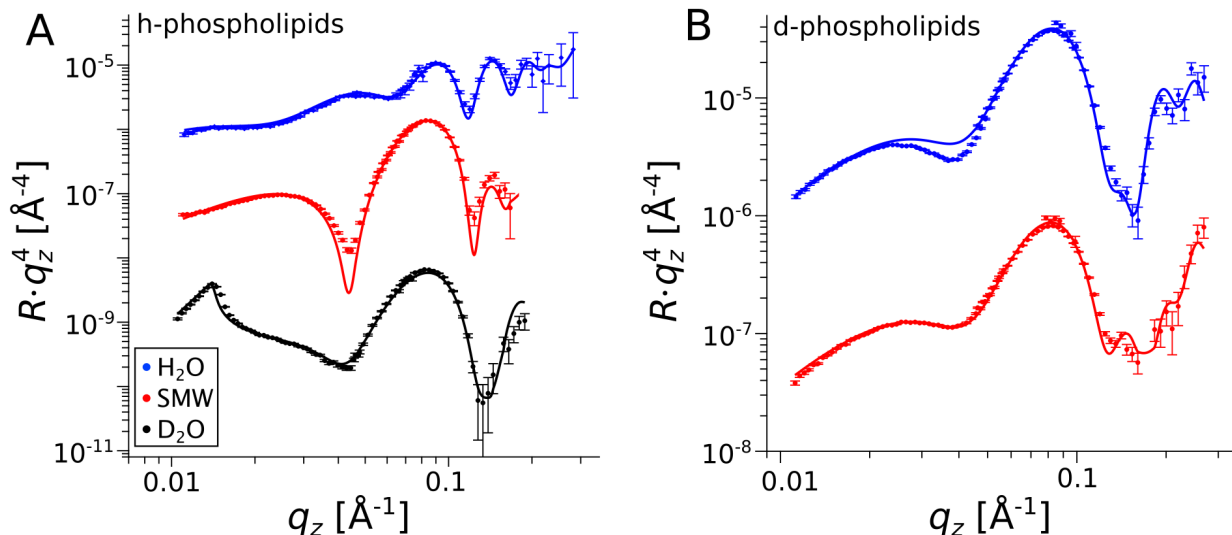

Figure S4: NR curves obtained at 25°C with a PC/Trihexo FLB. (A) Sample with chain-hydrogenous phospholipids. (B) Sample with chain-deuterated phospholipids. Solid lines: simulated reflectivity curves corresponding to a common volume fraction model reproducing all five reflectivity curves.

## PC/GM1 FLBs

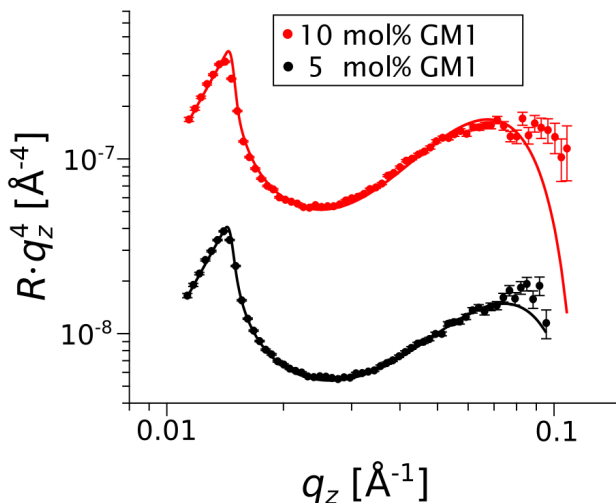

Figure S5: NR curves obtained at 25°C with PC/GM1 samples containing 10 mol% (top) or 5 mol% (bottom) GM1 in  $\text{D}_2\text{O}$  containing 100 mM NaCl. The curves are inconsistent with an FLB comprising two bilayers but consistent with a single supported lipid bilayer at both GM1 fractions. Solid lines: simulated reflectivity curves corresponding to single supported lipid bilayers.

## Coherent vs. incoherent treatment of FLBs with incomplete coverage

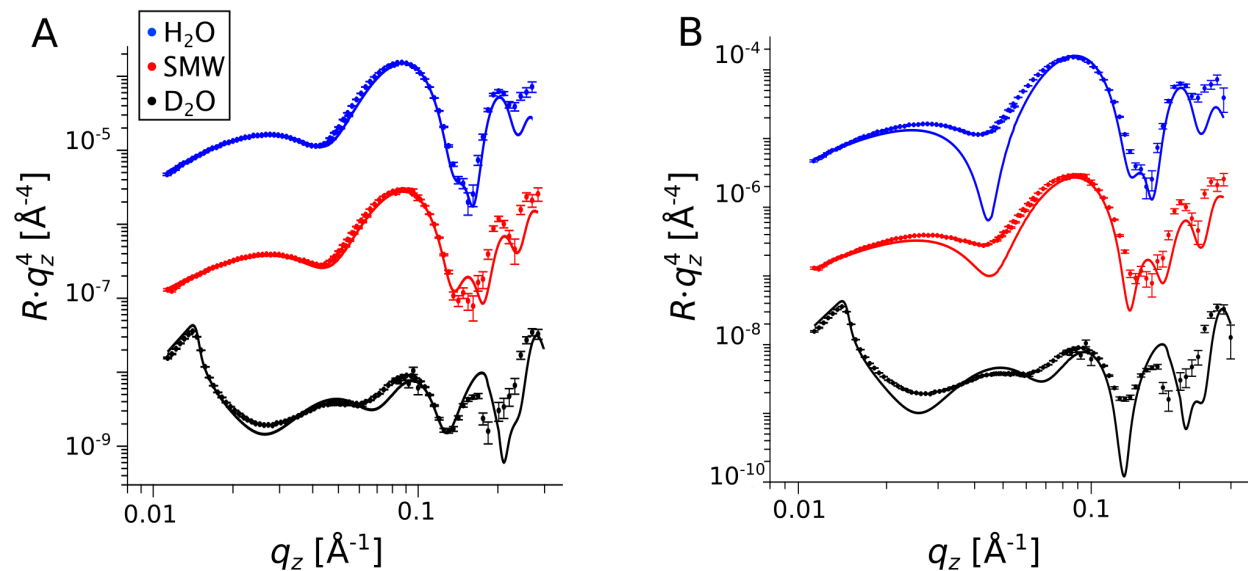

Figure S6: Comparison between incoherent (A) and coherent (B) treatments of NR data from a d-phospholipid-based PC/LacCer FLB at 25°C with incomplete coverage (see Table 3 in the main text). It is seen that the agreement is much poorer with the coherent treatment.

## Hydrophobic thickness of the proximal bilayer at 25°C and 50°C

Table S1: Hydrophobic thicknesses of the proximal bilayer obtained by NR at 25°C and 50°C.

| FLB sample | $2d_{\text{HC}}^{\text{prox}}, 50^\circ\text{C}$ [Å]<br>( $\pm 1$ ) | $2d_{\text{HC}}^{\text{prox}}, 25^\circ\text{C}$ [Å]<br>( $\pm 1$ ) |
|------------|---------------------------------------------------------------------|---------------------------------------------------------------------|
| PC         | 38                                                                  | 37                                                                  |
| PC/Trihexo | 40                                                                  | 39                                                                  |
| PC/LacCer  | 39                                                                  | 38                                                                  |
| PC/GM1     | 40                                                                  | -                                                                   |

# Influence of an independent thickness parameter for the GHG distribution

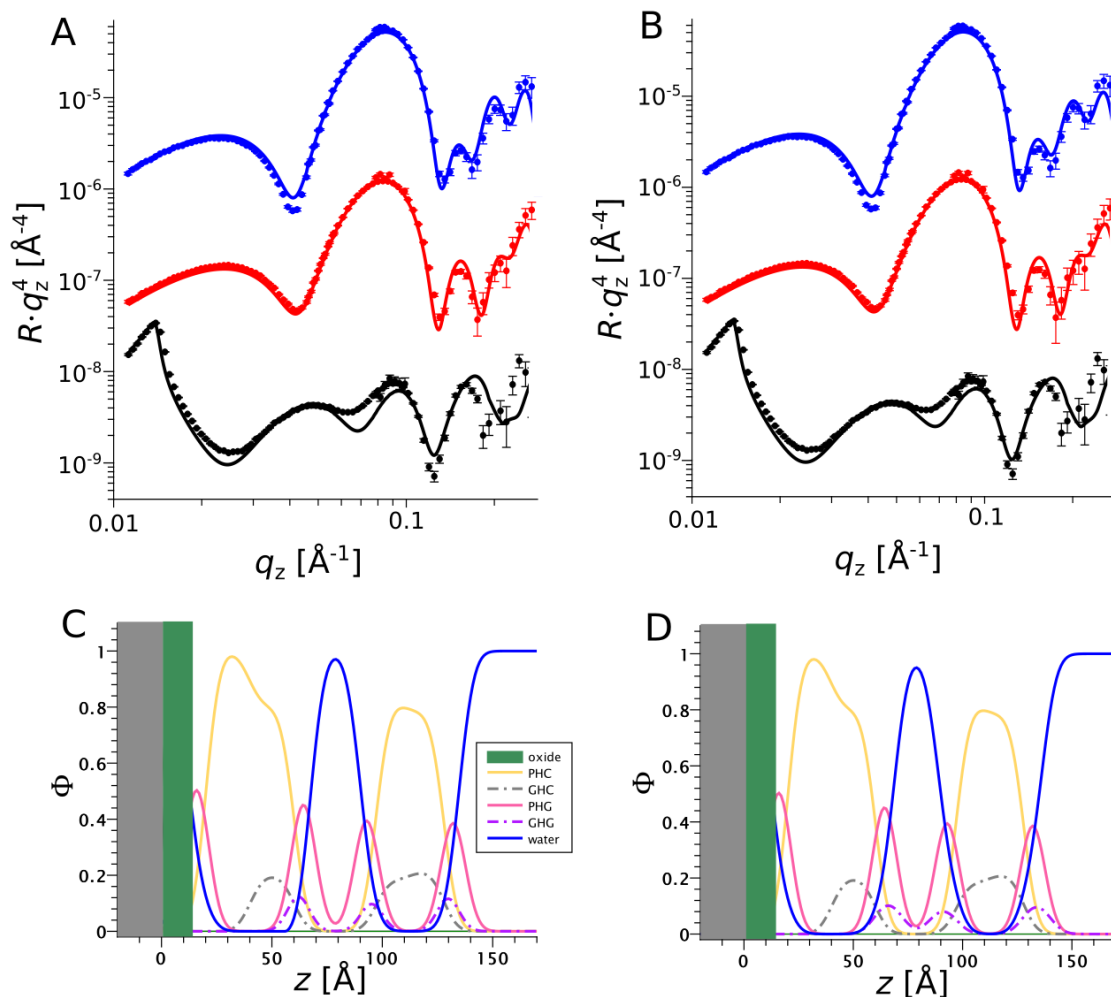

Figure S7: (A and B) NR data from a PC/Trihexo FLB with chain-deuterated PC lipids at 50°C together with the modeled reflectivity curves (solid lines) for different GHG layer thicknesses. (A)  $d_{\text{GHG}} = 4 \text{ \AA}$  (B)  $d_{\text{GHG}} = 12 \text{ \AA}$ . These thickness values cover the entire range from a flat-on headgroup configuration to a stretched perpendicular configuration. It is seen that the modeled curves are almost insensitive to the choice of  $d_{\text{GHG}}$ . (C and D) Associated volume fraction profiles for  $d_{\text{GHG}} = 4 \text{ \AA}$  (C) and  $d_{\text{GHG}} = 12 \text{ \AA}$  (D).



## Additional ellipsometry data

Table S2: Ellipsometric angles  $\Delta$  and  $\Psi$  after transfer of three lipid layers and corresponding overall lipid layer thickness  $D_{\text{lip}}$ . Nine spots in a 3 x 3 grid pattern were chosen as measurement points to obtain an average over the block surface. System: Pure PC lipid in all three monolayers.

| position on block | $\Delta$ [°] | $\Psi$ [°] | $D_{\text{lip}}$ [Å] |
|-------------------|--------------|------------|----------------------|
| top left          | 150.693      | 11.522     | 92                   |
| top center        | 150.716      | 11.545     | 92                   |
| top right         | 150.974      | 11.598     | 91                   |
| mid left          | 151.137      | 11.605     | 90                   |
| mid center        | 150.547      | 11.479     | 93                   |
| mid right         | 150.745      | 11.491     | 92                   |
| bottom left       | 150.649      | 11.444     | 92                   |
| bottom center     | 150.416      | 11.444     | 93                   |
| bottom right      | 150.853      | 11.465     | 91                   |

## References

- (1) Molinspiration Cheminformatics free web services, <https://www.molinspiration.com>, Sloveny Grob, Slovakia.
- (2) Rodriguez-Loureiro, I.; Latza, V. M.; Fragneto, G.; Schneck, E. Conformation of single and interacting lipopolysaccharide surfaces bearing O-side chains. *Biophysical Journal* **2018**, *114*, 1624–1635.
- (3) Sears, V. F. Neutron scattering lengths and cross sections. *Neutron news* **1992**, *3*, 26–37.
